# Supplementary material
Source: HighWire-hosted journal article supplement (https://bibliotheek.ehb.be/content/35/2/114)
Supplement: inline-supplementary-material-1 [file inline-supplementary-material-1.pdf]

## Appendix 1

*Table 3: showing additional details about the departments who took part in the study. Figures accessed through SitRep data from NHS England. Note: as Leeds St James' and Leeds General Infirmary are in the same trust, it is not possible to distinguish SitRep data, therefore the figures included represent both departments*

NHS England. A&E Attendances and Emergency Admissions 2013-14. Available from: <https://www.england.nhs.uk/statistics/statistical-work-areas/ae-waiting-times-and-activity/weekly-ae-sitreps-2013-14/> [accessed 8<sup>th</sup> August 2017]

|            |                                | Type of hospital/ED       | Total Number of ED attendances 17-23/03/14 | Admissions via type 1 ED 17-23/03/14 | Performance against 4-hour target 17-23/03/14 |
|------------|--------------------------------|---------------------------|--------------------------------------------|--------------------------------------|-----------------------------------------------|
| Department | Taunton, Musgrove Park         | District General Hospital | 1144                                       | 320                                  | 94.5%                                         |
|            | Leeds, St. James               | Teaching Hospital         | 4148                                       | 1488                                 | 96.3%                                         |
|            | Bath, Royal United             | District General Hospital | 1419                                       | 489                                  | 93.7%                                         |
|            | Portsmouth, Queen Alexandra    | District General Hospital | 2025                                       | 677                                  | 85.9%                                         |
|            | Sheffield NGH                  | Major Trauma Centre       | 2136                                       | 556                                  | 99.3%                                         |
|            | Norfolk and Norwich            | Teaching Hospital         | 2019                                       | 613                                  | 94.3%                                         |
|            | Leeds GI                       | Major Trauma Centre       | 4148                                       | 1488                                 | 96.3%                                         |
|            | Middlesbrough, James Cook      | Major Trauma Centre       | 2529                                       | 606                                  | 97.2%                                         |
|            | London, St. Thomas             | Teaching Hospital         | 2757                                       | 648                                  | 96.4%                                         |
|            | Dudley, Russell's Hall         | District General Hospital | 1971                                       | 510                                  | 92.0%                                         |
|            | Bolton, Royal Bolton           | District General Hospital | 2332                                       | 505                                  | 97.3%                                         |
|            | Birmingham Children's Hospital | Major Trauma Centre       | 1146                                       | 242                                  | 97.4%                                         |
